# Supplementary material for: Transcriptional repression of PTEN in neural cells using CRISPR/dCas9 epigenetic editing
Source: PubMed Central journal article supplement (PMC7347541; doi:10.1038/s41598-020-68257-y), 2020-07-09
Supplement: 41598_2020_68257_MOESM1_ESM.pdf [file 41598_2020_68257_MOESM1_ESM.pdf]

## **Supplementary information**

### Transcriptional repression of *PTEN* in neural cells using CRISPR/dCas9 epigenetic editing

Moses, C., Hodgetts, S. I., Nugent, F., Ben-Ary, G., Park, K. K., Blancafort, P.\*,  
Harvey, A. R.\*

\* To whom correspondence should be addressed. E-mail: alan.harvey@uwa.edu.au;  
pilar.blancafort@uwa.edu.au

**Supplementary Table 1. gRNA recognition sequences for *PTEN* repression.** The numbering of the start and end of each gRNA is given according to the Genome Reference Consortium Human Build 38 (GRCh38). PAM: protospacer-adjacent motif; F: forward strand guide; R: reverse strand guide. Location refers to the genomic position of the gRNA binding site in base pairs upstream (-) or downstream (+) the transcription start site of *PTEN* transcript NM\_000314.8 in GRCh38.

| gRNA | crRNA recognition sequence | PAM | F/R | Start    | End      | Location |
|------|----------------------------|-----|-----|----------|----------|----------|
| A    | GAGGATAACGAGCTAAGCCT       | CGG | R   | 87863256 | 87863237 | -368     |
| B    | GCGCAGAGTCCCAAGCCGC        | AGG | R   | 87863383 | 87863364 | -241     |
| C    | GCTGCGGCAGGATACGCGCT       | CGG | F   | 87863580 | 87863599 | -45      |
| D    | GCGCCTGTGAGCAGCCCGG        | GGG | F   | 87863748 | 87863767 | +123     |

**Supplementary Table 2. Analysis of predicted off-target binding sites of *PTEN* gRNAs.** In the off-target recognition sequence, mismatches to the cognate gRNA sequence are shown in lower case and underlined. Position refers to chromosomal location in GRCh38. Distances from the TSS of off-target genes are approximate and refer to annotated RefSeq transcripts. Literature-curated TF binding sites and associated genes are from the PAZAR and JASPAR databases. Regions of H3K4me3, H3K4me1 and H3K27ac enrichment are obtained from the ENCODE project. Chr: chromosome; TF: transcription factor; TSS: transcription start site.

| gRNA                                               | Off-target recognition sequence                    | Chr       | Position  | Direction | Mismatches | Proximity to regulatory elements                                                                                                                                                                     | Potential gene affected       |
|----------------------------------------------------|----------------------------------------------------|-----------|-----------|-----------|------------|------------------------------------------------------------------------------------------------------------------------------------------------------------------------------------------------------|-------------------------------|
| A                                                  | GAGGATAACGAGC <u>cc</u> AGCC <u>a</u> GGG          | 19        | 16105684  | +         | 3          | None                                                                                                                                                                                                 | None                          |
| B                                                  | G <u>a</u> GCA <u>t</u> A <u>a</u> TCCCCAAGCCGCTGG | 3         | 119690285 | -         | 3          | 12 kb upstream of <i>COX17</i> TSS; overlaps CTCF TF binding sites for <i>COX17</i> ; in DNase I hypersensitive region                                                                               | <i>COX17</i>                  |
|                                                    | GC <u>t</u> CAGAGTCCCCAAG <u>g</u> C <u>c</u> CTGG | 3         | 140566600 | +         | 3          | None                                                                                                                                                                                                 | None                          |
|                                                    | GCGC <u>t</u> GAGTCCCCAAGC <u>a</u> G <u>a</u> TGG | 4         | 8738833   | +         | 3          | None                                                                                                                                                                                                 | None                          |
|                                                    | G <u>t</u> GCAGAGTCCCCAAG <u>g</u> CG <u>g</u> CGG | 5         | 73447021  | +         | 3          | 1.5 kb downstream of <i>FOXD1</i> TSS; in CpG island; overlaps E2F4 and EGR1 TF binding sites for <i>FOXD1</i> ; in DNase I hypersensitive region; in region of H3K27ac, H3K4me3, H3K4me1 enrichment | <i>FOXD1</i>                  |
|                                                    | GCGC <u>a</u> AGTCCC <u>a</u> AGCCGCCGG            | 1         | 923628    | +         | 3          | 2 kb upstream of <i>SAMD11</i> TSS; in CpG island; overlaps EGR1 TF binding sites for <i>SAMD11</i> ; in region of H3K4me3, H3K4me1 enrichment                                                       | <i>SAMD11</i>                 |
|                                                    | GC <u>t</u> CAGAG <u>a</u> CCCCAAGCC <u>t</u> CGGG | 1         | 3983348   | -         | 3          | None                                                                                                                                                                                                 | None                          |
| G <u>t</u> GC <u>t</u> GAGTCCCCAAGCC <u>c</u> CAGG | 9                                                  | 136764513 | +         | 3         | None       | None                                                                                                                                                                                                 |                               |
| C                                                  | GCTGCG <u>t</u> CgGGATAgGCGCTGGG                   | 16        | 89721972  | +         | 3          | 1 kb upstream of <i>VPS9D1</i> TSS; overlaps SMARCA4 TF binding                                                                                                                                      | <i>VPS9D1</i> ; <i>ZNF276</i> |

|   |                          |    |           |   |   |                                                                                                                                                             |                             |
|---|--------------------------|----|-----------|---|---|-------------------------------------------------------------------------------------------------------------------------------------------------------------|-----------------------------|
|   |                          |    |           |   |   | site for VPS9D1; 1 kb downstream of <i>ZNF276</i> TSS; overlaps STAT1 TF binding site for <i>ZNF276</i> ; in region of H3K27ac, H3K4me3, H3K4me1 enrichment |                             |
|   | GCTGaGGCAGGAgACTcCGCTTGG | 1  | 1497763   | + | 3 | None                                                                                                                                                        | None                        |
|   | GCTGCaGCAGGATACaCcCTGGG  | 1  | 18823163  | + | 3 | None                                                                                                                                                        | None                        |
|   | GCTGgGGCAGGATAaAtCGCTTGG | 13 | 34275296  | + | 3 | None                                                                                                                                                        | None                        |
|   | GCTGCGGCAGGAgAatCGCTTGG  | 13 | 110571118 | + | 3 | None                                                                                                                                                        | None                        |
|   | GCTGaGGCAGGAgACTcCGCTTGG | 10 | 86424569  | + | 3 | None                                                                                                                                                        | None                        |
|   | GCTGaGGCAGGAaACTcCGCTTGG | 10 | 110432686 | - | 3 | None                                                                                                                                                        | None                        |
|   | GCTGaGGCAGGATAaAtCGCTCGG | 18 | 50856030  | - | 3 | None                                                                                                                                                        | None                        |
|   | GCTGCaGCAtGATACGtGCTAGG  | 11 | 50193345  | + | 3 | None                                                                                                                                                        | None                        |
| D | aCGCgTGTcAGCAGCCGCGGCGG  | 7  | 150975260 | + | 3 | 3 kb downstream of <i>KCNH2</i> TSS; overlaps EGR1 and TFAP2C TF binding sites for <i>KCNH2</i> ; in region of H3K27ac, H3K4me3, H3K4me1 enrichment         | <i>KCNH2</i>                |
|   | GCCcCTGTGAGCAGCctCtGTGG  | 4  | 8025678   | - | 3 | None                                                                                                                                                        | None                        |
|   | GCCcCTGTGAGCAGctGCaGGGG  | 16 | 897591    | + | 3 | None                                                                                                                                                        | None                        |
|   | GCCcCTGTGgGCAGCCaCGGGG   | 1  | 2177765   | - | 3 | None                                                                                                                                                        | None                        |
|   | GCGCCgGcGAGCAGCCcCGGGG   | 19 | 1851994   | + | 3 | 0.4 kb upstream of <i>KLF16</i> TSS; in CpG island; overlaps SMARCA4 TF binding site for <i>REXO1</i> ; in DNase I hypersensitive region                    | <i>KLF16</i> ; <i>REXO1</i> |

|                         |    |           |   |   |                                                                                                                                                        |              |
|-------------------------|----|-----------|---|---|--------------------------------------------------------------------------------------------------------------------------------------------------------|--------------|
| GCGCCaGTGAGCAGgCGCaGCGG | 17 | 17164604  | + | 3 | 60 kb downstream of <i>MPRIP</i> TSS; in CpG island                                                                                                    | <i>MPRIP</i> |
| GCTcCTGTcAGCAGctGCGGAGG | 10 | 129709862 | - | 3 | None                                                                                                                                                   | None         |
| GCGCCTGTGAGCAGctGgaGAGG | 14 | 54348869  | + | 3 | 45 kb upstream of <i>CDKN3</i> TSS; overlaps CTCF TF binding site for <i>CDKN3</i> ; in DNase I hypersensitive region; in region of H3K4me1 enrichment | <i>CDKN3</i> |

**Supplementary Table 3. shRNA recognition sequences for *PTEN* repression.** Numbering refers to start position relative to the TSS of *PTEN* mRNA transcript variant 1 (Genbank accession number NM\_000314.8) in mRNA not DNA. nt: nucleotide.

| shRNA | Recognition sequence   | Location in <i>PTEN</i> transcript |
|-------|------------------------|------------------------------------|
| +874  | GCAGAAACAAAAGGAGATATCA | Exon 1                             |
| +1436 | GATGATGTTTGAAACTATTCCA | Exon 5                             |
| +1608 | GTAGAGTTCTTCCACAAACAGA | Exon 6                             |
| +2022 | GATGAAGATCAGCATTCACAAA | Exon 9 (1 nt mismatch)             |

**Supplementary Table 4. TaqMan Gene Expression Assays used for qRT-PCR in *PTEN* repression experiments.** For each gene, the TaqMan Assay ID, targeted RefSeq transcripts and reporter dye are listed.

| Gene          | Assay ID      | RefSeq sequence(s)                                                | Dye     |
|---------------|---------------|-------------------------------------------------------------------|---------|
| <i>PTEN</i>   | Hs02621230_s1 | NM_000314.8<br>NM_001304717.2<br>NM_001304718.1                   | FAM-MGB |
| <i>GAPDH</i>  | Hs02786624_g1 | NM_001256799.2<br>NM_001289745.1<br>NM_001289746.1<br>NM_002046.5 | FAM-MGB |
| <i>SAMD11</i> | Hs00942141_m1 | NM_152486.2                                                       | FAM-MGB |
| <i>KLF16</i>  | Hs00259103_m1 | NM_031918.3                                                       | FAM-MGB |

**Supplementary Table 5. Primers used for SYBR Green qRT-PCR in *PTEN* repression experiments.**

| Gene              | Forward primer          | Reverse primer           |
|-------------------|-------------------------|--------------------------|
| <i>COX17</i>      | GTCATAGCTGCTTTTGGCG     | TCACACAGCAGACCACCATT     |
| <i>FOXD1</i>      | ATTGAACCCGAGAACGTCCG    | TCAGATGCGTGCGTTACAGA     |
| <i>VPS9D1</i>     | CGCCATGAAGCTTGCCAAC     | ATGCTCCTCAGGTATTCCGT     |
| <i>ZNF276</i>     | GGGTCCTCTAGGAACCTCGG    | GACGACCCAGGAGACAGGAA     |
| <i>KCNH2</i>      | CAGCTCGAGCCAGGCAG       | ATGAAGCCAGGGTGGTTGTG     |
| <i>REXO1</i>      | TCCAGGACAATGTGGATGGG    | GTCTTGGCGTCTTCTCGAAC     |
| <i>MPRIIP</i>     | CACCTGCCTACGTGGACTC     | CCAGGGTGGCATATTGCCTG     |
| <i>CDKN3</i>      | AGCCGCCAGTTCAATACAA     | TCACTCGTGACAAAGATAGCCA   |
| <i>GAPDH</i>      | CTTAGCACCCCTGGCCAAG     | GGCAGGGATGATGTTCTGGA     |
| <i>Pten</i> (rat) | TTGAAGACCATAACCCACCACAG | CACAAATCATTACACCAGTCCGTC |
| <i>Ppia</i> (rat) | AGCATACAGGTCTTGGCATC    | TTCACCTTCCCAAAGACCAC     |



**Supplementary Table 6. Antibodies used for Western blotting in *PTEN* repression experiments.** For each antibody, the isotype, manufacturer, catalogue number, molecular weight of the antigen and dilution factor in *PTEN* repression experiments are listed.

| Antibody   | Isotype    | Manufacturer           | Cat. no.    | Molecular weight | Dilution |
|------------|------------|------------------------|-------------|------------------|----------|
| PTEN       | Rabbit IgG | CST                    | 9559        | 54 kDa           | 1/1000   |
| GAPDH      | Rabbit IgG | CST                    | 2118        | 37 kDa           | 1/5000   |
| Rabbit-HRP | Goat IgG   | Jackson ImmunoResearch | 111-035-144 | —                | 1/1000   |
| Mouse-HRP  | Goat IgG   | Jackson ImmunoResearch | 115-035-003 | —                | 1/1000   |

**Supplementary Table 7. Primers used for ChIP-qPCR of *PTEN* and *GAPDH* regulatory regions.**

| Gene         | Forward primer       | Reverse primer        | Product size |
|--------------|----------------------|-----------------------|--------------|
| <i>PTEN</i>  | ATGTGGCGGGACTCTTTATG | GCGGCTCAACTCTCAAACCTT | 119 bp       |
| <i>GAPDH</i> | TACTAGCGGTTTTACGGGCG | GAGGCTGCGGGCTCAATTT   | 137 bp       |

**Supplementary Table 8. Antibodies used for immunofluorescence in *PTEN* repression experiments.** For each antibody, the isotype, manufacturer, catalogue number and dilution factor in *PTEN* repression experiments are listed.

| Antibody      | Isotype    | Manufacturer | Cat. no.    | Dilution |
|---------------|------------|--------------|-------------|----------|
| GFP           | Mouse IgG  | Roche        | 11814460001 | 1/500    |
| Nestin        | Rabbit IgG | Biologend    | 841901      | 1/500    |
| B-III tubulin | Rabbit IgG | Biologend    | 802001      | 1/500    |

**HEK 293T**  
**PTEN**

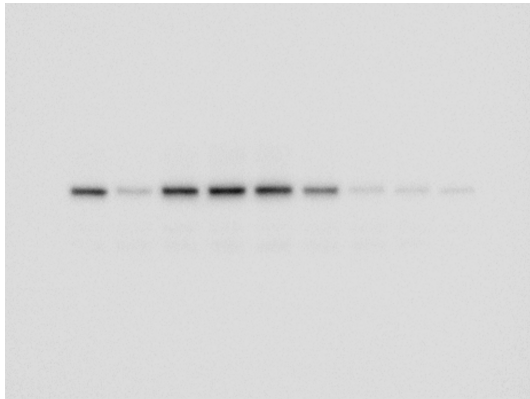

**hMPCs**  
**PTEN**

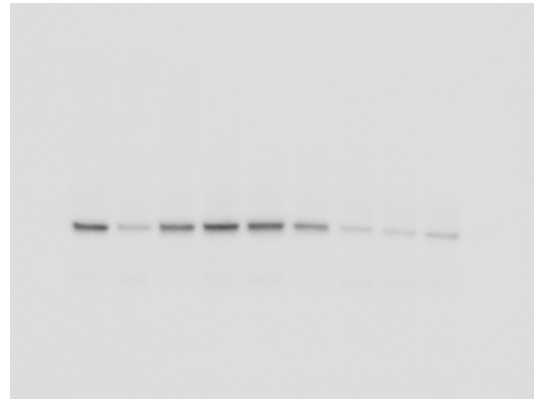

**HEK 293T**  
**GAPDH**

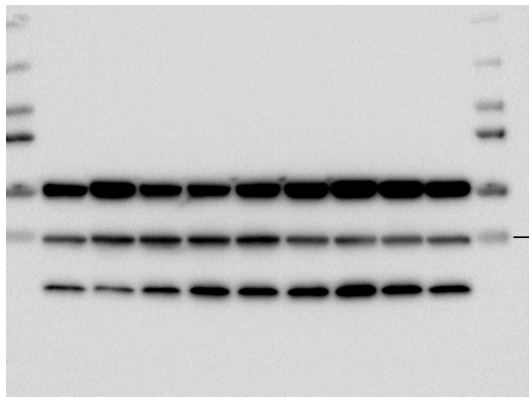

**hMPCs**  
**GAPDH**

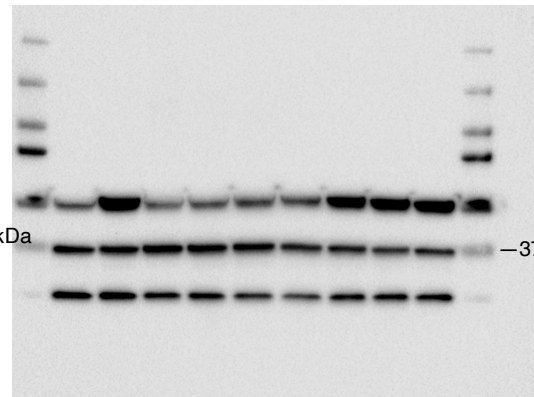

**Supplementary Figure 1. Uncropped images of Western blots from Figure 2.** GAPDH blots show Bio-Rad Precision Plus Protein Kaleidoscope Prestained Protein Standards with 37 kDa standard annotated.
